# Supplementary material
Source: Royal Society of Chemistry journal article supplement (doi:10.1039/d5fo05215g)

## Supporting Information

**Table S1.** Clinical sickness score.

| Score | Appearance                            | Response to touch                                                                          | Natural activity                                              | Body color                                    |
|-------|---------------------------------------|--------------------------------------------------------------------------------------------|---------------------------------------------------------------|-----------------------------------------------|
| 0     | Tonic and well hydrated               | Alert without any stimulation                                                              | Moving normally in the cage                                   | Pink                                          |
| 1     | Slimmer, but still tonic and hydrated | Responding to mild stimulation (gentle foot touch)                                         | Able to wriggle if put in the supine position                 | Pale or dark distal extremities, fingers/toes |
| 2     | Skinny, floppy, and dehydrated        | Responding to Vigorous stimulation (foot pinch)                                            | Unable to wriggle if put in the supine position               | Paleness on the whole body                    |
| 3     | Gasping and in agony                  | Unresponsive even to vigorous stimulation (does not become alert when picked up and moved) | Not moving limbs and lying still, supine or lateral decubitus | Gray                                          |

**Table S2.** Macroscopic assessment score of intestines.

| Score | Consistency                                                   | Color                                   | Dilation                                  |
|-------|---------------------------------------------------------------|-----------------------------------------|-------------------------------------------|
| 0     | Normal, does not tear when dissecting from surrounding tissue | Normal, yellow/tan                      | Normal, no dilation                       |
| 1     | Moderately friable                                            | Patchy discoloration, pink, congested   | Patchy areas of dilation                  |
| 2     | Liquefied, jelly-like, extremely friable                      | Extensive discoloration, dark, necrotic | Extensive dilation throughout small bowel |

**Table S3.** Primer sequences for real-time PCR.

| Gene      | Primer sequence (5'-3') |                       |
|-----------|-------------------------|-----------------------|
|           | Forward                 | Reverse               |
| TLR4      | GAGGACTGGGTGAGAAACGA    | AGATACACCAACGGCTCTGG  |
| MyD88     | GAGATCCGCGAGTTTGAGAC    | CTGTTTCTGCTGGTTGCGTA  |
| Claudin-1 | AGGTCTGGCGACATTAGTGG    | CCTGGCCAAATTCATACCTGG |
| ZO-1      | TGCTCCAGCAGGTCCTAAGT    | TGGTAGCTGAGGGCAGAACT  |
| Occludin  | CTTGTCTTGGGAGCCTTGAC    | AAAGAGTATGCCGGCTGAGA  |
| MUC2      | AAGTGATTGTGTTCCGGGCT    | ATGGAGATGTTCTTGGCGCA  |
| IL-10     | TGCGACGCTGTCATCGATTT    | GTAGATGCCGGGTGGTTCAA  |

|                |                        |                      |
|----------------|------------------------|----------------------|
| FOXP3          | CAACACTCACCCACAACGTC   | TGTACACGTGTGCGTTCTGA |
| ROR $\gamma$ T | GCAAGTCCTACCGAGAGACG   | TCTGATCATTCTGGCACAGC |
| IL-23          | AGGACAACAGCCAGTTCTGTTT | GAGGCCAGTAGGGAGGTAT  |
| IL-17A         | TGGACTCTGAGCCGCAATG    | ATGTGGTGGTCCAACCTCCC |
| Gapdh          | AGACAGCCGCATCTTCTTGT   | CTTGCCGTGGGTAGAGTCAT |

**Fig. S1.** Phylogenetic tree of *L. rhamnosus* 1.0320 and other strains based on 16S rRNA gene sequences.

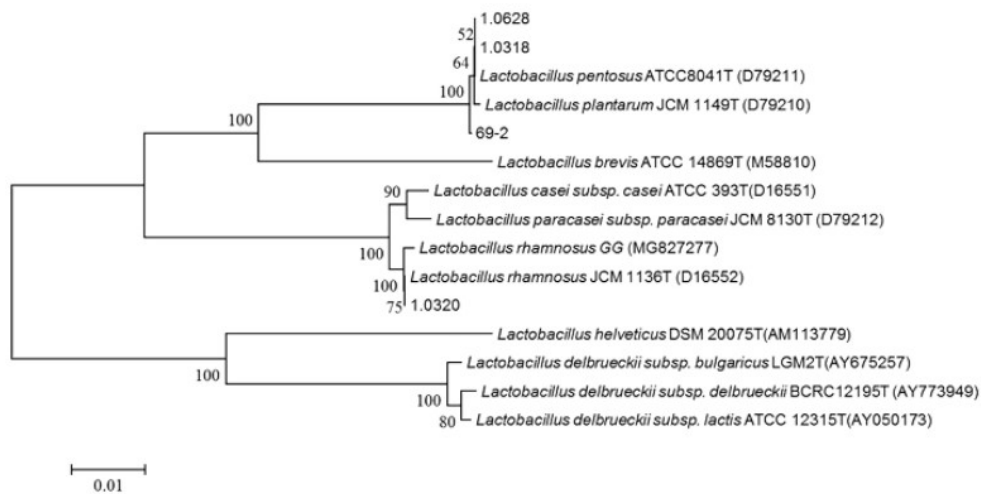

**Fig. S2.** Determination of probiotic characteristics of *L. rhamnosus* 1.0320. (A) Acid resistance of *Lactobacillus* strains to pH3, (B) Bile salt resistance of *Lactobacillus* strains to 0.3% bile salt, (C) Adhesion ability of *Lactobacillus* strains to Caco-2 cells, (D) Surface hydrophobicity ability of *Lactobacillus* strains. All data are expressed as mean  $\pm$  SD. Different letters indicate significant difference ( $P < 0.05$ ).

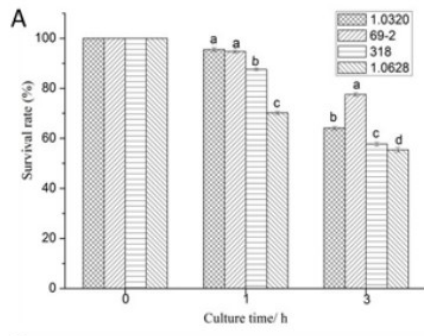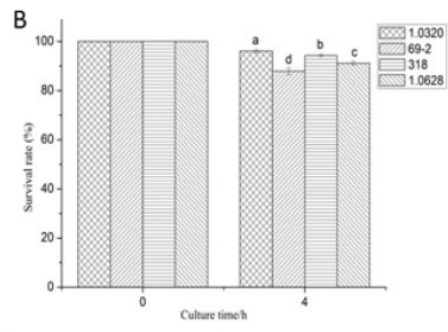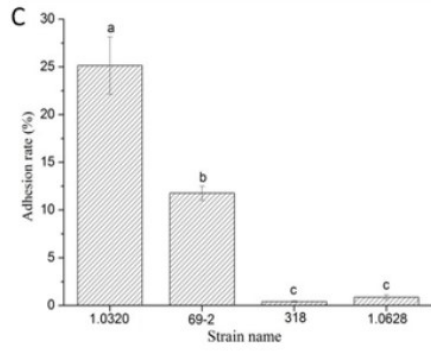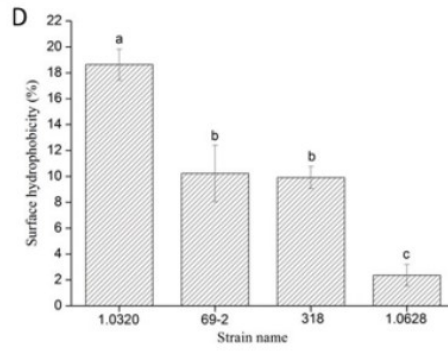

Supplement: d5fo05215g1.pdf [file d5fo05215g1.pdf]
