# Supplementary material
Source: Royal Society of Chemistry journal article supplement (doi:10.1039/d5fo05215g)

## Supporting Information

### 1. The images of western blot

#### 1.1 Representative protein blots of TLR4

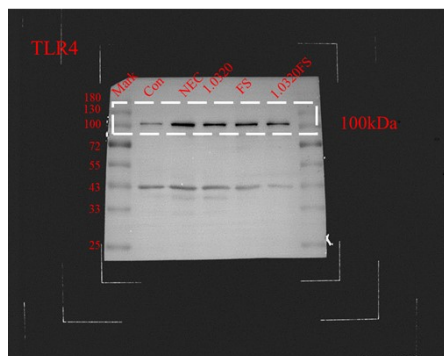

#### 1.2 Representative protein blots of MyD88

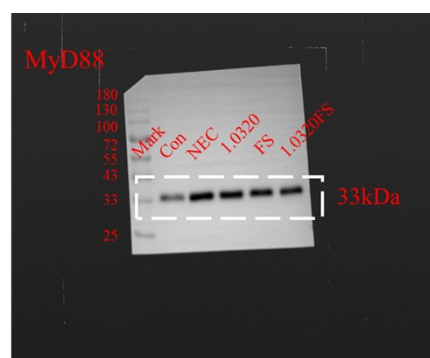

#### 1.3 Representative protein blots of P- NF-κB p65

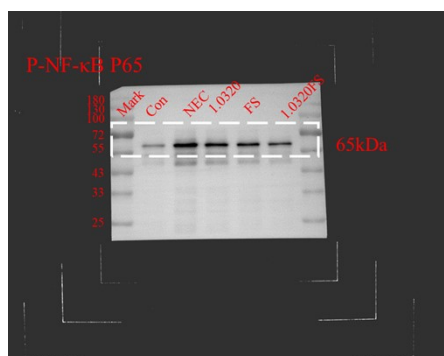

#### 1.4 Representative protein blots of NF-κB p65

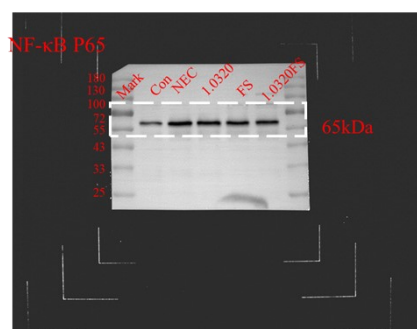

#### 1.5 Representative protein blots of β-actin

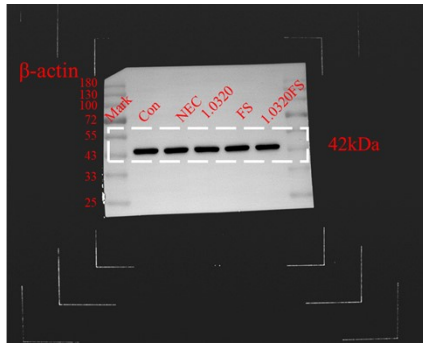

1.6 Representative protein blots of Nrf2

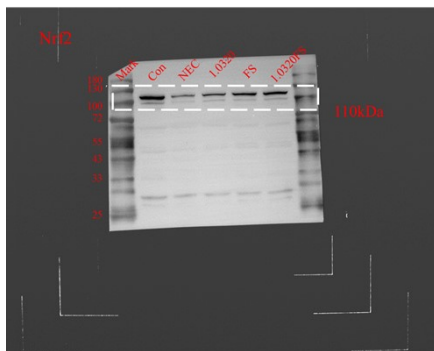

1.7 Representative protein blots of NQO1

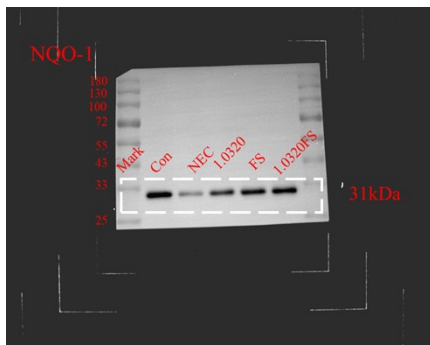

1.8 Representative protein blots of  $\beta$ -actin

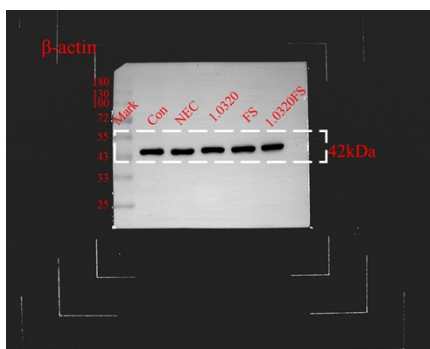

Supplement: d5fo05215g2.pdf [file d5fo05215g2.pdf]
